## Non-random mating and information theory

A. Carvajal-Rodríguez

Departamento de Bioquímica, Genética e Inmunología. Universidad de Vigo, 36310  
Vigo, Spain.

\*: A. Carvajal-Rodríguez. Departamento de Bioquímica, Genética e Inmunología.

Universidad de Vigo, 36310 Vigo, Spain. Phone: +34 986813828

*email:* [acraaj@uvigo.es](mailto:acraaj@uvigo.es)

**Keywords:** Mate choice, sexual selection, sexual isolation, Price equation, Kullback-Leibler divergence, population genetics.

## *Abstract*

1 In this work, mate choice is modeled by means of the abstract concept of mutual mating  
2 propensity. This only assumes that different type of couples can have different mating  
3 success. The model is adequate for any population where mating occurs among distinct  
4 types. There is no extra assumption about particular mating scheme or preference  
5 model. The concept of mutual mating propensity permits to express the observed  
6 change in the mating phenotypes as the gain in information with respect to random  
7 mating. The obtained expression is a form of the Price equation in which the mapping  
8 between ancestral and descendant population is substituted by a mapping between  
9 random mating and non random mating population.

10 At the same time, this framework provides the connection between mate choice and the  
11 exact mathematical partition of the choice effects, namely sexual isolation, sexual  
12 selection and a mixed effect. The sexual selection component is the sum of the intra-  
13 sexual male and female selection.

14 The proposed framework helps to unveil previously hidden invariants. For example, if  
15 the mutual preference between partner types is multiplicative there is no sexual isolation  
16 (inter-sexual selection) effect on the frequencies, i.e. the only possible effect of mate  
17 choice is intra-sexual selection. On the contrary, whatever the contribution of each  
18 partner to the mutual preference, if it comes as a non-multiplicative factor, there is at  
19 least an inter-sexual selection detectable effect.

20 This new view over the mate choice problem, permits to develop general mating  
21 propensity models and to make predictions of the mate choice effects that may emerge  
22 from such models. This possibility opens up the way for setting a general theory of  
23 model fitting and multimodel inference for mate choice.

24 Thus, it is suggested that the proposed framework, by describing mate choice as the  
25 flow of information due to non-random mating, provides a new important setting for  
26 exploring different mating models and their consequences.

27

## 28 **1. Introduction**

29 Mate choice is arguably one of the most active areas of evolutionary research. There has  
30 been a lot controversy regarding the concept of mate choice. The debate around mate  
31 choice was due in part to its importance for fields so diverse as population genetics,  
32 evolutionary-ecology, animal behavior, sociology, or psychology. In addition, there has  
33 been an excess of verbal models and imprecise terminology regarding different aspects  
34 of mate choice (Edward, 2015). Mate choice can be broadly described as the effect of  
35 some expressed traits leading to non-random mating. Under this broad definition there  
36 are various aspects that can be considered. Yet Darwin (1871) distinguishes between  
37 intrasexual selection and intersexual selection. The first arises directly from competition  
38 among individuals of the same sex while the second arises from choice of mates by the  
39 other sex (Kuijper et al., 2012). Alternatively, from a population genetics point of view,  
40 mate choice is defined as the observed mating frequency deviation with respect to  
41 random mating, considering population gene or phenotype frequencies. So defined,  
42 mate choice can be partitioned into (intra)sexual selection, defined as the observed  
43 change in gene or phenotype frequencies in mated individuals with respect to  
44 population frequencies, and sexual isolation (behavioral isolation or intersexual  
45 selection), defined as the deviation from random mating in mated individuals (Rolán-  
46 Alvarez and Caballero, 2000). In this work I followed these definitions of mate choice,  
47 intrasexual and intersexual selection.

48 The many aspects and complexity of mate choice justifies the extensive research that  
49 has been made in the last decades producing several theoretical models and empirical  
50 tests. Related to modeling and detection of mate choice, there is the question about the  
51 correct null hypothesis for testing the evolution of mate choice. The Lande-Kirpatrick  
52 (L-K) model has been proposed as a null model (Kirkpatrick, 1982; Lande, 1981; Prum,

53 2010; Roff and Fairbairn, 2014). This model assumes neutral genetic variation for the  
54 mating preference trait while the target trait can be under natural selection. However,  
55 the L-K role as a null model is not clear when the preference is set by similarity  
56 (preference and target trait coincide) and the target trait is "magic" sensu Gavrilets  
57 (2004) because in this case the preference trait is already under selection (Hughes,  
58 2015).

59 Therefore, there is still a need for both, null models and a general framework, where the  
60 key essential facts of the mate choice can be adequately described. Here, I argue that the  
61 formalism provided by the information theory in the form of the Jeffrey divergence is  
62 the right tool to do so.

63 The information theory has already been elegantly applied for describing evolutionary  
64 change (Frank, 2009; Frank, 2012b; Frank, 2013). The present work takes advantage of  
65 that mathematical structure and applies it for modeling the change in mating frequencies  
66 due to mate choice. As far as I know there is no previous attempt of describing mate  
67 choice from the viewpoint of the information theory. Nevertheless, the potential of the  
68 informational view for evolutionary ecology has been already suggested (Dall et al.,  
69 2005).

70 First, I defined a general model that only requires an abstract functional relationship  
71 connecting the observed mating frequencies with the expected by random mating from  
72 the population gene or phenotype frequencies. This suffices for developing a general  
73 information equation for mate choice that can be adequately partitioned into intrasexual  
74 and intersexual information components, plus a mixed term provoked by the  
75 confounding effect of the marginal frequencies when the mating propensity effects are  
76 asymmetric. Interestingly, the three terms can be separately estimated from the observed

77 frequencies and so, the researcher can study how different models and parameters  
78 translate into the different mate choice components. Also, it is proposed that this setting  
79 provides the baseline for solving the mate choice null hypothesis problem, since the null  
80 model emerges naturally from the idea of zero information. Thus, the correct null  
81 should not rely on neutral preference or trait genes but on zero information.

82 The utility of this framework is shown by analyzing a real data example. I will show  
83 how the view obtained from the unveiled relationships can be utilized to classify  
84 different general models from its consequences which facilitates the multimodel  
85 inference of the mate choice. However, a deeper study on the outcomes of different  
86 forms of the mating preference functions is out of the scope of the present article and is  
87 part of a different paper.

88

## 89 **2. Model of Mate Choice**

90 As mentioned above, the following model is as a particular specification of the  
91 information theory interpretation for evolutionary models, proposed in (Frank, 2012b;  
92 Frank, 2013). The general framework developed by this author fits perfectly for the  
93 purpose of describing the occurrence of non-random mating and the flow of information  
94 that it provokes. Remarkably, once the basic equation for the gain in information due to  
95 non-random mating is formalized, the relationship between mate choice and its different  
96 evolutionary outcomes emerges naturally, providing a clear and useful picture of the  
97 intrasexual and intersexual selection effects.

98

### 99 *2.1 General model*

100 Let consider a population with a number of  $n_1$  females and  $n_2$  males. For a given female  
101 phenotype  $X$  (e.g. shell color) with  $K$  different classes having values  $X_1, X_2 \dots X_k$ , the  
102 frequency of the phenotype  $X_i$  in the female population is  $p_{1i} = n_{1X_i} / n_1$ , i.e. the number  
103 of females with that phenotypic value divided by the total number of females. Similarly,  
104 for the male phenotype  $Y$  (could be the same as  $X$ ) with  $K'$  classes, the frequency of  $Y_j$  in  
105 the male population is  $p_{2j} = n_{2Y_j} / n_2$ .

106 In this way, by using the frequency of the phenotype for each sex, we compute the  
107 expected mating frequencies if mating is at random, as

$$108 \quad q_{ij} = p_{1i} \times p_{2j}.$$

109 Let's represent the relative mutual mating propensity between female phenotype  $X_i$  and  
110 male phenotype  $Y_j$ , for successfully mating in the environment  $e$  as

$$111 \quad m_{ij}(x,y,e)/M$$

112 where  $M = \sum_{i,j} q_{ij} m_{ij}(x,y,e)$ .

113 Then, the observed mating frequencies in a given environment  $e$  can be expressed as

$$114 \quad q'_{ij} = q_{ij} \frac{m_{ij}(x,y,e)}{M} \quad (1)$$

115 Therefore, the observed mating frequencies are the result of the functions  $m_{ij}(x,y,e)$   
116 (hereafter noted as  $m_{ij}$ ), that can be any kind of composition of the preference of female  
117  $X_i$  for male  $Y_j$ , and vice versa, in the environment  $e$ .

118 Note that random mating is a particular case of the model in (1) when the propensities  
119 are equal for every mating pair. The mutual mating propensity functions can represent  
120 empirical or analytical functions, as for example the Gaussian-like preference functions  
121 (reviewed in Carvajal-Rodriguez and Rolán-Alvarez, 2014). Moreover, each  $m_{ij}$  can be

122 composed of female and male preferences, so mutual mate choice models (Bergstrom  
123 and Real, 2000) are also available under this setting. The standardized  $m_{ij}$  values could  
124 also be estimated a posteriori from the data. In this case they coincide with the pair total  
125 index i.e. the ratio of the frequency of the observed types divided by the expected pair  
126 types calculated from the total frequencies ( $PTI_{ij} = q'_{ij}/q_{ij}$  Rolán-Alvarez and Caballero,  
127 2000) which becomes an observation of the mutual mating propensity from the mating  
128 phenotypes (see below).

129 Once we have the mating frequencies as defined in (1), the change with respect to  
130 random mating is

$$131 \quad \Delta q_{ij} = q'_{ij} - q_{ij} = q_{ij} \left( \frac{m_{ij}}{M} - 1 \right)$$

132 The mean population change for a combined phenotype  $Z = X \circ Y$  is

$$\Delta Z = \sum_{i,j} \Delta q_{ij} Z_{ij}$$

133 Because the relationship in (1) is defined by ratios is more natural to express the  
134 quantities in the logarithmic scale and so we can express  $m_{ij}$  as

$$135 \quad m_{ij} = M \frac{q'_{ij}}{q_{ij}}$$

136 which in the logarithmic scale becomes

$$137 \quad l_{ij} = \log(m_{ij}) = \log(M) + \log\left(\frac{q'_{ij}}{q_{ij}}\right)$$

138 Thus, if we take the logarithm of the propensity as the combined phenotype  $Z$  and by  
139 noting that  $\sum \Delta q_{ij} = 0$  and that  $\log(M)$  is constant through the summation, then we can  
140 measure the mean population change  $\Delta L$  in relative propensity as



141 
$$\Delta L = \sum_{i,j} \Delta q_{ij} l_{ij} = \sum_{i,j} \Delta q_{ij} \log \left( \frac{q'_{ij}}{q_{ij}} \right) = J(q', q) = J_{PTI} \quad (2)$$

142 which is the Kullback-Leibler symmetrized divergence (noted as Jeffreys in Frank,  
143 2012b), that measures the gain in information when the differential mating propensity  
144 moves the population from mating frequencies  $q$  to  $q'$  or vice versa. Note that if the  
145 propensity is equal for every pair i.e.  $M = m_{ij} \forall i,j$  then  $q' = q$  so that  $J = 0$  which is the  
146 minimum information value since  $J$  cannot be negative.

147 Recall from equation (1), that each  $m_{ij}/M$  is the ratio of the frequency of the observed  
148 types divided by the expected pair types from the total frequencies . This is, by  
149 definition, the pair total index  $PTI$  (Rolán-Alvarez and Caballero, 2000) and so, the  
150 logarithmic term in  $\Delta L$  is the logarithm of the  $PTI$  values. Therefore,  $J(q', q)$  measures  
151 the gain in information as captured by the  $PTI$  coefficients, confronting the hypothesis  
152 of mate choice against random mating. Hereafter, we note this  $J$  as  $J_{PTI}$ .

153 Interestingly enough, the Jeffreys' divergence computed as  $J_{PTI}$  (by taking the natural  
154 logarithm and multiplying (2) by the total number of matings) is well approximated by a  
155 chi-square for the null hypothesis of random mating with  $KK'-1$  degrees of freedom  
156 (Evren and Tuna, 2012).

157 The information obtained from  $J_{PTI}$  has been computed using the different propensities  
158 as classes for classifying the couples i.e. we considered  $\log(m)$  as the phenotype  $Z$ .  
159 When the classes are based upon other phenotypes rather than propensities, we are  
160 conveying a specific meaning for the change in frequencies, say, the change in mating  
161 frequencies due to differential mutual propensities is observed in terms of change in  
162 shell color mating frequencies. Therefore, the phenotype can be viewed as other scale  
163 on which we can measure this information (Frank, 2013). Of course, different kinds of

164 phenotypes can be more or less involved in mate choice and so, different scales are  
165 more or less useful for measuring the mate choice information.

166

## 167 *2.2 Relative propensity and phenotypes*

168 When we observe any mating pair  $(i,j)$ , we need to identify the mating by a given  
169 characteristic (e.g. shell color) since we cannot directly classify it by the value of the  
170 propensity function  $m_{ij}$ . In general, we ignore the specific form of the mutual mating  
171 propensity function  $m$  and so, we may assume that some phenotype matches it perfectly,  
172 as we did above (each phenotypic pair was perfectly differentiated by specific  $m_{ij}$   
173 mating propensity).

174 Therefore, we may think on different traits  $Z$  that classify the mating pairs;  $Z$  can be a  
175 composition of female trait  $X$ , e.g. preference, and male target  $Y$ , or can be any kind of  
176 different traits or alternatively the same trait in both sexes as size, age or color. In any  
177 case, we measure the mean change in  $Z$  caused by differences in  $m$ , as

$$178 \quad \Delta_m Z = \sum_{i,j} \Delta q_{ij} Z_{ij} = \sum_{i,j} q_{ij} (m_{ij} - M) \frac{Z_{ij}}{M} = \frac{cov(Z,m)}{M} \quad (3)$$

179 Where  $cov$  is the population covariance in the sense of Price (1972) as highlighted in  
180 Frank (2012a).

181 Equation (3) is in fact, a form of the Price equation with a different mapping for the  
182 populations involved. While the Price equation (Frank, 2012a; Price, 1972) describes  
183 the change in phenotype between two connected ancestor and descendant populations;  
184 in our equation (3), the mapping is between the random mating population and the one  
185 obtained under a given mutual mating propensity scheme.

186 The covariance  $cov(m,Z)$  is the regression  $\beta(Z,m)$  multiplied by the variance  $V(m)$ . The  
187 variable  $Z$  can be any desired trait including, as we assumed above, the logarithm of the  
188 propensities. So, if we take  $Z$  equal to the logarithm of  $m$ , then by substituting in (3) we  
189 obtain

$$190 \quad \Delta L = cov(m,l) / M = \beta(l,m)V(m) / M$$

191 remembering from (2) that  $\Delta L = J_{PTI}$  then  $V(m) / M = J_{PTI} / \beta(l,m)$  so that

$$192 \quad \Delta_m Z = \beta(Z, m) \frac{V(m)}{M} = \alpha_z J_{PTI}.$$

193 The term  $\alpha_z = \frac{\beta(Z,m)}{\beta(l,m)}$  changes the scale from mutual mating propensity to phenotypes.

194 From the point of view of the estimation with real data, if we cannot measure directly  
195 the values of  $m$  then we simply compute  $J$  based on trait  $Z$  and therefore we are really  
196 computing

$$197 \quad JZ_{PTI} = \alpha_z J_{PTI} \text{ so}$$

$$198 \quad \Delta_m Z = JZ_{PTI}$$

199 In this case, note that the  $PTI$  coefficients are no longer the estimate of the mutual  
200 mating propensities because the ratio of frequencies  $q'_{ij}/q_{ij}$  does not correspond to  $m_{ij}/M$   
201 but is a proxy that would be more or less precise depending on the importance of the  
202 measured phenotype over the mating choice. For example, if shell size is driving mate  
203 choice, the measure of  $JZ_{PTI}$  ( $Z = \text{shell size}$ ) would correspond well with  $J_{PTI}$ . However,  
204 if other phenotype as shell color has nothing to do with mate choice (and is not  
205 correlated with shell size) then the measure of  $JZ_{PTI}$  ( $Z = \text{shell color}$ ) would be zero.  
206 Further details about the distinction between  $JZ_{PTI}$  and  $J_{PTI}$  are given in the appendix A.

207 The mate choice mediated by the differences in mutual mating propensity would  
208 produce a deviation from random mating. At the same time, this may cause two  
209 different effects, namely, intrasexual selection and intersexual selection, hereafter noted  
210 as sexual selection and sexual isolation, respectively.

211

### 212 2.3. *Sexual selection*

213 Sexual selection is defined as the observed change in gene or phenotype frequencies in  
214 mated individuals with respect to total population frequencies (Rolán-Alvarez and  
215 Caballero, 2000). This change can be studied using the frequencies within each sex, or  
216 considering jointly both sexes, by using the pair sexual selection coefficient (*PSS*,  
217 Rolán-Alvarez and Caballero, 2000). I will show that, when the *PSS* coefficients are  
218 considered a priori as the marginal propensities for the mating types, the information  
219 gained due to sexual selection is the sum of the information from each sex. When the  
220 focus is on the phenotypes instead on the propensities, the partition continue to be true,  
221 provided that the same phenotypic scale is applied when computing the *PSS* coefficients  
222 and the intrasexual components.

223 From the general model, the population frequency of the female phenotype  $X_i$  is  $p_{1i}$ . The  
224 observed frequency of  $X_i$  in mated individuals,  $p'_{1i}$ , is computed as the sum of the  
225 mating frequencies involving a female  $X_i$

$$226 \quad p'_{1i} = \sum_j^{males} q'_{ij} = p_{1i} \sum_j p_{2j} \frac{m_{ij}}{M} = p_{1i} \frac{m'_{fi}}{M}$$

227 where  $m'_{fi}$  is the marginal mating propensity for the female type  $i$ .

228 Similarly for males, the frequency of phenotype  $Y_j$  is  $p_{2j}$  and the frequency for the male  
 229 type  $j$  in mated individuals is

$$230 \quad p'_{2j} = p_{2j} \frac{m'_{mj}}{M}$$

231 where  $m'_{mj}$  is the marginal mating propensity for the male type  $j$ .

232 The mean change in information due to sexual selection within each sex is, in terms of  
 233 the female marginal propensity (female intrasexual selection)

$$234 \quad \Delta_m L_x = \sum_i^{females} \Delta p_{1i} X_i = \sum_{ij} p_i (m'_{fi} - M) \frac{X_i}{M} = J(p'_1, p_1) = J_{S1}$$

235 and, in terms of male marginal propensity (male intrasexual selection)

$$236 \quad \Delta_m L_y = \sum_j^{males} \Delta p_{2j} Y_j = J(p'_2, p_2) = J_{S2}$$

237 The term  $J_S$  has been obtained in a similar way as for the general case, i.e. by expressing  
 238 each marginal  $m'_{fi}$  and  $m'_{mj}$  in function of their respective ratio of frequencies multiplied  
 239 by the mean propensity  $M$  and substituting the phenotype  $X$  or  $Y$ , by the logarithm of the  
 240 corresponding (female or male) marginal  $m'$ .

241 The change to the scale of phenotypes produces

$$242 \quad \Delta_m \bar{X} = \frac{\beta_{xm}}{\beta_{lm}} J_{S1} = JX_{S1}$$

$$243 \quad \Delta_m \bar{Y} = \frac{\beta_{ym}}{\beta_{lm}} J_{S2} = JY_{S2}$$

244  $JX_{S1}$  and  $JY_{S2}$  are the Jeffrey's divergence that expresses the gain of information due to  
 245 intrasexual selection measured on the combined phenotypic scale  $Z$ .

246 *2.4. Pair sexual selection*

247 In addition to the computation within each sex, we can compare the expected pair types  
248 under random mating calculated in mated individuals, with the expected pair types from  
249 total numbers ( $PSS$ , see above). Thus,  $PSS_{ij} = (p'_{1i}p'_{2j}) / (p_{1i}p_{2j}) = m'_{fi}m'_{mj} / M^2$ . The latter  
250 term can be viewed as an a priori expression of the  $PSS$  coefficients. Again, the  
251 difference between the observed and the expected distribution can be expressed as

$$252 \quad \Delta_{PSS}L = \sum_{i,j} \Delta(p_{1i}p_{2j}) \log \left( \frac{p'_{1i}p'_{2j}}{p_{1i}p_{2j}} \right) = J(p'_1p'_2, p_1p_2) = J_{PSS},$$

253 where  $\Delta(p_{1i}p_{2j}) = p'_{1i}p'_{2j} - p_{1i}p_{2j}$ .

254 In the scale of phenotypes

$$255 \quad \Delta_{PSS}\bar{Z} = \frac{\beta_{zpss}}{\beta_{lpss}} J_{PSS} = JZ_{PSS}$$

256 The change in the phenotype due to sexual selection is driven by the aprioristic version  
257 of  $PSS$ , and is expressed in term of the information accumulated and rescaled from the  
258 marginal propensities to  $Z$ .

259 The relationship between sexual selection measured within sex and the pair sexual  
260 selection measured by  $PSS$  is (details in Appendix B)

$$261 \quad J_{PSS} = J_{S1} + J_{S2}$$

262 And in the scale of phenotypes

$$263 \quad JZ_{PSS} = JX_{S1} + JY_{S2} \quad (4)$$

264 provided that the same phenotypic scale applies in the pair sexual selection statistic and  
265 in the intrasexual components (i.e. the criteria utilized for classifying the different  
266 couples is the same).

267 The information captured in the *PSS* coefficients is the sum of the sexual selection  
 268 within each sex.

269

## 270 2.5. Sexual isolation

271 Sexual isolation is defined as the deviation from random mating in mated individuals  
 272 (Rolán-Alvarez and Caballero, 2000). The pair sexual isolation statistic (*PSI*) is the  
 273 number of observed pair types divided by the expected pair types from mates. In terms  
 274 of our model this is the ratio of frequencies

$$275 \quad \delta_{ij} = q'_{ij}/(p'_{1i}p'_{2j}) = (m_{ij}/M) / (m'_{fi}m'_{mj}/M^2) = PSI_{ij} \quad (5)$$

276 The term  $\delta$  refers to an aprioristic (depends on the  $m$ 's from the model) definition of the  
 277 *PSIs*. The joint isolation index for *PSI* can be expressed as

$$278 \quad I_{PSI} = \frac{(k-1)\sum_i \delta_{ii} - \sum_{ij} \delta_{ij}}{(k-1)\sum_i \delta_{ii} + \sum_{ij} \delta_{ij}}$$

279 where  $k$  is the number of phenotypic classes involved in the classification of the matings  
 280 (Carvajal-Rodriguez and Rolan-Alvarez, 2006).

281 As with the previous pairwise statistics, we may obtain the equations of change between  
 282 observed and expected pair types in terms of  $J$ .

$$283 \quad \Delta_{PSI} L = \sum_{i,j} \Delta(p'_{1i}p'_{2j}) \log \left( \frac{q'_{ij}}{p'_{1i}p'_{2j}} \right) = J(q', p'_1 p'_2) = J_{PSI},$$

284 where  $\Delta(p'_{1i}p'_{2j}) = q'_{ij} - p'_{1i}p'_{2j}$ .

285 In the scale of phenotypes

$$286 \quad \Delta_{PSI} \bar{Z} = \frac{\beta_{z\delta}}{\beta_{l\delta}} J_{PSI} = J Z_{PSI}.$$

287 The  $JZ_{PSI}$  index provides the correct metric to express the part of change in mating  
288 information that translates into sexual isolation. Presenting the  $PSI$ 's under this  
289 formalism allow us to appreciate some facts that are not obvious from the a posteriori  
290 definition of coefficients estimated from data. We must realize (see equation 5) that if  
291 the propensity of each pair is the product of the marginal types of each partner then  $\delta =$   
292 1 and so, both, the values of  $I_{PSI}$  and  $J_{PSI}$  are zero indicating no sexual isolation at all.  
293 Thus, in any model in which the mutual mating propensity is multiplicative, the only  
294 possible outcome from mate choice is intrasexual selection (see below).

295

### 296 **3. Relationship between Mate Choice, Sexual Selection and Sexual Isolation**

297 The information as captured by the  $PTI$  coefficients can be partitioned in terms of  $PSS$   
298 and  $PSI$ . Recall the expression (2) for  $J_{PTI}$

$$299 \quad \Delta L = \sum_{i,j} \Delta q_{ij} \log \left( \frac{q'_{ij}}{q_{ij}} \right) = J(q', q) = J_{PTI}$$

300 The term  $\Delta q_{ij}$  can be expressed as the sum of the frequency changes for sexual selection  
301 and isolation

$$302 \quad \Delta q_{ij} = \Delta(p_{1i}p_{2j}) + \Delta(p'_{1i}p'_{2j})$$

303 The logarithmic term  $\log(q'_{ij}/q_{ij})$  which we have also noted as  $\log(PTI)$  is also  
304 partitioned in the sexual selection and isolation components

$$305 \quad \log(PTI) = \log(PSS) + \log(PSI).$$

306 Therefore

$$307 \quad J_{PTI} = \sum_{ij} ([\Delta(p_{1i}p_{2j}) + \Delta(p'_{1i}p'_{2j})] \times [\log(PSS_{ij}) + \log(PSI_{ij})]) \text{ i.e.}$$



308 
$$J_{PTI} = J_{PSS} + J_{PSI} + E_0$$

309 where  $E_0 = \sum_{ij} (\Delta(p_{1i}p_{2j}) \log(PSI_{ij}) + \Delta(p'_{1i}p'_{2j}) \log(PSS_{ij}))$ . However, note that

310  $\Delta(p'_{1i}p'_{2j}) \log(PSS_{ij}) = 0$  (see Appendix C) so finally

311 
$$E_0 = \sum_{ij} (\Delta(p_{1i}p_{2j}) \log(PSI_{ij}))$$

312 that can also be expressed as

313 
$$E_0 = D'_{KL}(w, q' || p')$$

314 which is a Kullback–Leibler-like divergence with weights  $w_{ij} = (PSS_{ij} - 1) / PTI_{ij}$  in the  
315 observations  $q'$ . Note that contrary to the standard K-L divergence,  $E_0$  can be negative  
316 depending on the weights.

317 The total information is separated into the sexual selection ( $J_{PSS}$ ) and isolation ( $J_{PSI}$ )  
318 components plus the mixed term  $E_0$ . Note that  $E_0$  appears only when both sexual  
319 selection and sexual isolation effects occur.

320 If  $E_0 = 0$  this means that  $J_{PSS}$  and/or  $J_{PSI}$  capture the complete information from mate  
321 choice. When  $E_0$  is positive it indicates that the information gathered from  $J_{PSS}$  and  $J_{PSI}$   
322 is not the total information from mating choice. On the other side, when  $E_0$  is negative  
323 there is some overlap between sexual selection and sexual isolation information.

324 In the scale of phenotypes the partition still holds provided that the same phenotypic  
325 classification is applied when computing the different measures

326 
$$JZ_{PTI} = JZ_{PSS} + JZ_{PSI} + ZE_0 \quad (6)$$

327 where  $ZE_0$  is the value of  $E_0$  in the phenotypic scale.

328 For any given logarithmic base, the amount of the total information,  $JZ_{PTI}$ , depends on  
329 the magnitude of the differences among the mutual mating propensity values in the  
330 population. The higher the differences encountered the higher the value of  $JZ_{PTI}$ .  
331 Without loss of generality, from herein we consider the natural logarithm because this  
332 facilitates testing against the null hypothesis of no information by means of the chi-  
333 square distribution.

334 If, as expected, the observations used to compute the information statistics come from  
335 the same sample, the sum in (6) is exact so it recovers the whole information gathered  
336 from mate choice. On the contrary, if the computations has been performed using  
337 different samples, it could be a remaining part of mate choice information that is non-  
338 explained by the above statistics but that can be recovered by the error term

$$339 \quad E_{PTI} = JZ_{PTI} - (JZ_{PSS} + JZ_{PSI} + ZE_0) \quad (7)$$

340 that reflects how much information may be lost due to differences in the measurement  
341 of the involved phenotypes when computing the different information components from  
342 separate samples.

343

#### 344 **4. Real Data Application**

345 The theoretical framework I have presented so far has been defined in a general way, for  
346 any number of male and female phenotypic classes, and for any kind of mutual mating  
347 propensities. The application of the  $J$  statistics to a data sample of dimorphic traits (two  
348 classes), is immediate. For clarity, I will use the same example that appears in the  
349 pairwise statistics ( $PTI$ ,  $PSI$  and  $PSS$ ) original article (Rolán-Alvarez and Caballero,  
350 2000). The correspondence between the pairwise statistics notation used by (Rolán-

351 Alvarez and Caballero, 2000) and ours is as follows. The two phenotypic types are  
 352 noted as  $A$  and  $B$ , the total number of observed matings is  $t$  and the number of  $A$  type  
 353 females ( $A'$  in Rolán-Alvarez and Caballero, 2000) becomes, under our notation,  $p_{1A}n_1$ ,  
 354 and so  $B'$  is  $p_{1B}n_1$ ; the number of  $A$  males becomes  $p_{2A}n_2$  and  $B$  males are  $p_{2B}n_2$ . The  
 355 observed absolute number for each pair  $(i,j)$  would be  $q'_{ij}t$  with  $i,j \in \{A, B\}$  (see Table  
 356 1). The total number of expected mating pairs from population frequencies is  $n_1n_2$   
 357 corresponding to the quantity  $S$  in (Rolán-Alvarez and Caballero, 2000).

358 **TABLE 1. The mating model for two phenotypic classes identified as types  $A$  and**  
 359  **$B$ . The number of observed mating pairs is  $t$ .**

|         |             |             |            |            |
|---------|-------------|-------------|------------|------------|
| Females |             |             |            |            |
|         | $p_{1A}n_1$ | $p_{1B}n_1$ |            |            |
| Males   | $p_{2A}n_2$ | $q'_{AA}t$  | $q'_{BA}t$ | $p'_{2A}t$ |
|         | $p_{2B}n_2$ | $q'_{AB}t$  | $q'_{BB}t$ | $p'_{2B}t$ |
|         | $p'_{1A}t$  | $p'_{1B}t$  |            |            |

360  $p_{ii}$ : observed relative frequency of type  $i \in \{A, B\}$  in population females ;  $n_1$ : number of females in the  
 361 population;  $p_{2i}$ : observed relative frequency of type  $i \in \{A, B\}$  in population males ;  $n_2$ : number of males in  
 362 the population;  $p'_{ii}$ : observed relative frequency of type  $i$  in mating females;  $p'_{2i}$ : observed relative  
 363 frequency of type  $i$  in mating males;  $q'_{ij}$ : observed relative frequency of mating pair  $i, j$ .

364

365 The data correspond to a multiple-choice experiment involving two different lines of  
 366 *Drosophila melanogaster* so called  $M$ -like and  $Z$ -like (Hollocher et al., 1997). Rolán-  
 367 Alvarez & Caballero applied the pairwise statistics to this data and confirmed the  
 368 previous results from Hollocher *et al* indicating stronger sexual isolation than sexual  
 369 selection. They also suggested a fitness advantage of females versus males but they

370 were not able of distinguishing between female sexual selection and male preference for  
371 *M* females.

372 To perform the analysis, we expressed the observed data from that experiment in terms  
373 of the information model as presented in Table 1. In doing so, and noting that the  
374 observed number of mating pairs was  $t = 1704$ , we obtained the necessary quantities in  
375 terms of our model (Table 2).

376 The total mate choice information obtained in  $JZ_{PTI}$  is partitioned in 89% of sexual  
377 isolation ( $JZ_{PSI} / JZ_{PTI} = 0.468 / 0.526 = 0.89$ ;  $I_{PSI} = 0.63$ ), 6% of sexual selection and  
378 5% of mixed effects which explains the 100% of  $JZ_{PTI}$ . The information coming from  
379 sexual isolation is 14 times that from sexual selection, result that matches pretty well the  
380 outcome in (Rolán-Alvarez and Caballero, 2000).

381 The value of  $JZ_{PTI}$  multiplied by the number of matings can be approximated by a chi-  
382 square variable with 3 degrees of freedom under the expectation of  $JZ_{PTI} = 0$ , the  $p$ -  
383 value obtained was below 0.00001 which indicates non-random mating. The test against  
384  $JZ_{PSI} = 0$  with 1 degree of freedom, also had a  $p$ -value below 0.00001. The test against  
385  $JZ_{PSS} = 0$  was also below 0.0001. However, testing separately the female and male  
386 sexual selection cases (with one degree of freedom each) produced a  $p$ -value below  
387 0.0001 for the female case but a  $p$ -value of 0.77 for males.

388 Thus, we detected significant sexual isolation and selection effects as previously  
389 reported by (Rolán-Alvarez and Caballero, 2000). The sexual selection component is  
390 caused by a significant intrasexual effect in females. The mixed term  $E_0$  is positive thus  
391 indicating that not all the information is recovered by the  $PSS$  and  $PSI$  coefficients. This  
392 is due to the confounding effect which explains as far as the 5% from the total  
393 information.

394

395 **TABLE 2. Analysis using the mate choice information model (Table 1 and**  
 396 **equations 7) on *D. melanogaster* mating data from (Hollocher et al., 1997). The**  
 397 **number of observed copulating pairs is  $t = 1704$ .**

|                          | Females Z         |                      | Females M            |                      |
|--------------------------|-------------------|----------------------|----------------------|----------------------|
|                          |                   | $0.5 \times 1440$    | $0.5 \times 1440$    |                      |
| Males Z                  | $0.5 \times 1440$ | $0.3585 \times 1704$ | $0.145 \times 1704$  | $0.5035 \times 1704$ |
| Males M                  | $0.5 \times 1440$ | $0.051 \times 1704$  | $0.4455 \times 1704$ | $0.4965 \times 1704$ |
|                          |                   | $0.4095 \times 1704$ | $0.5905 \times 1704$ |                      |
| $JZ_{PTI}$               | 0.526             |                      |                      |                      |
| $JZ_{PSI}$ ( $I_{PSI}$ ) | 0.468 (0.63)      |                      |                      |                      |
| $JX_{S1} + JY_{S2}$      | $0.033 + 0.00005$ |                      |                      |                      |
| $ZE_0$                   | 0.024             |                      |                      |                      |
| $E_{PTI}$                | 0                 |                      |                      |                      |

398 Number of females in the population:  $n_1 = 1440$ ; number of males in the population:  $n_2 = 1440$ ; From  
 399 Table 1,  $p'_{1i}$ : observed relative frequency of type  $i$  in mating females;  $p'_{2i}$ : observed relative frequency of  
 400 type  $i$  in mating males;  $q'_{ij}$ : observed relative frequency of copulating pair  $i, j$ .

401

#### 402 *4.1 Exploring models*

403 In the analysis performed above we used the information partition for testing if the  
 404 observations can be explained by random mating, in a similar way as we do when using  
 405 the  $I_{PSI}$  statistic for testing sexual isolation (Carvajal-Rodriguez and Rolan-Alvarez,  
 406 2006).

407 However, the proposed theoretical framework permits going further than just testing  
408 random mating. We can rely on the described properties of mutual propensities under  
409 sexual selection and isolation, for defining different effects models. If we can define  
410 models from which we can predict the effects, then we can try to fit and infer significant  
411 parameters from the available data.

412 As an example, I have used the software InfoMating (Carvajal-Rodriguez, 2017) to  
413 estimate the mutual mating propensity parameters associated to the data in Table 2. The  
414 software uses the  $J$  information framework to a priori construct (before data) different  
415 effects models, and then compare the fitting of random mating, sexual selection and  
416 sexual isolation models to the data. There are models having sexual selection only in  
417 females, only in males or in both. The models with sexual isolation will have or not  
418 sexual selection depending on the frequencies (the conditions on marginal propensities  
419 for sexual selection are frequency dependent). The most complex model is also  
420 considered. Under this model the mutual mating propensities are estimated by the  $PTIs$   
421 that are indeed the maximum likelihood estimates.

422 I have considered BIC (Schwarz, 1978) and AIC (Akaike, 1973) selection criteria. Both  
423 gave similar results. The best fit model was a two parameter model with sexual isolation  
424 and female sexual selection effects. The model uses two parameters  $a$  and  $b$  to define  
425 the four mating propensity values as  $m_{ZZ} = a$ ,  $m_{ZM} = 1-b$ ,  $m_{MZ} = 1$ ,  $m_{MM} = a+b$ .

426 The obtained estimates under the BIC criterion were  $a = 2.47$  and  $b = 0.64$  which after  
427 normalization, provide the mutual mating propensity estimates as they appear in Table  
428 3.

429 **TABLE 3. Mutual-propensity estimates from multimodel inference.**

|      | Female | Z    | M    |
|------|--------|------|------|
| Male |        |      |      |
| Z    |        | 1.42 | 0.58 |
| M    |        | 0.21 | 1.79 |

430

431 The obtained estimates are almost identical to the corresponding *PTI* values but we have  
432 only needed two parameters instead of three for defining the model. Therefore, the two  
433 parameter model may provide some insight into the biology of the mating relationships.

434 The obtained estimates imply positive assortative mating because the homotype mutual  
435 propensities (main diagonal in Table 3) are higher than the heterotype ones  
436 (antidiagonal,  $m_{ZM}$  and  $m_{MZ}$ ). If we compare the mean homotype versus the mean  
437 heterotype mating propensities, the difference is  $a + b - 1$ . The value 1 is the value  
438 under random mating so, the increase of homotype mating with respect to random  
439 mating is  $a + b$ .

440 Moreover, the chosen model has no male sexual selection effect. This is clear when we  
441 measure the mean effect of changing the male type in the matings. We see that the  
442 effect is 0 i.e.  $(m_{MM} - m_{MZ} + m_{ZM} - m_{ZZ}) / 2 = 0$ . On the contrary, the mean effect of  
443 changing female Z by M is  $b$ .

444 Thus, the deviation from random mating in the data from Table 2 is composed of a  
445 sexual isolation effect captured by the parameter  $a$  plus an effect  $b$  of sexual selection  
446 focused on the M females which may imply that this females are more receptive to  
447 mating in general.

448

## 449 **5. Female preference and male display models**

450 The example we have considered involves the same trait in female and male. However,  
451 there are several situations where the female preference is for a male display trait  
452 (Pomiankowski and Iwasa, 1998). In this case, the female trait is the exerted preference  
453 and the male trait is the target phenotype. In the preference-display context, the traits  
454 involved are different between sexes so that the crosses cannot be classified in  
455 homotypic versus heterotypic, which prevents the calculation of  $I_{PSI}$  and other similar  
456 indices that are only applicable to mating models in which the female and male  
457 phenotype is the same (similarity/dissimilarity models).

458 The mutual mating propensity framework can easily capture the preference-display  
459 scenario to express the components of mate choice in terms of information.

460 In Table 4 we appreciate three examples of such preference-display models. There are  
461 two types of females which have preference for males displaying phenotypic values  $A$ ,  
462  $B$  or  $C$ . The frequencies for the different phenotypes are equal. The mating propensities  
463 have been defined with only one parameter and three possible values, namely  $a$ ,  $a/2$  or  
464 virtually 0 ( $\epsilon$ ). In the first column the female preference generates a situation of  
465 complete isolation; in the second column the resultant effect of the female preference is  
466 of full intrasexual selection in males and the third column corresponds to a mixed  
467 scenario where both sexual selection and isolation occur with a mixed effect of -24%  
468 than indicates an strong overlap between both effects.

469

470 **TABLE 4. Mating propensity models of female preference for male display traits.**

471 **Two types of females ‘0’ or ‘1’ might have different preferences for males**

472 **presenting distinct values for some secondary trait ( $a = 1$ ,  $a/2$  or  $\epsilon$ ). Females are the**



473 **choosy sex so that the generic model implies only the female acceptance (or**  
 474 **preference) function  $f_1$ .**

| $m_{\text{female},\text{male}}$  | Isolation  | Sexual selection | Mixed           | Generic    |
|----------------------------------|------------|------------------|-----------------|------------|
| $m_{0A}$                         | $a$        | $a$              | $a$             | $f_1(0,A)$ |
| $m_{0B}$                         | $a/2$      | $a/2$            | $\epsilon$      | $f_1(0,B)$ |
| $m_{0C}$                         | $\epsilon$ | $\epsilon$       | $\epsilon$      | $f_1(0,C)$ |
| $m_{1A}$                         | $\epsilon$ | $a$              | $\epsilon$      | $f_1(1,A)$ |
| $m_{1B}$                         | $a/2$      | $a/2$            | $\epsilon$      | $f_1(1,B)$ |
| $m_{1C}$                         | $a$        | $\epsilon$       | $a$             | $f_1(1,C)$ |
| $JZ_{PTI}$                       | 13         | 13               | 26              |            |
| $JZ_{PSI} / JZ_{PTI}$            | 100%       | 0%               | 75%             |            |
| $(JX_{S1} + JY_{S2}) / JZ_{PTI}$ | 0%         | 100% (0% + 100%) | 49% (0% + 100%) |            |
| $ZE_0 / JZ_{PTI}$                | 0%         | 0%               | -24%            |            |

475  $\epsilon$ : represents an infinitesimal value for which the quantity  $\epsilon \log(\epsilon)$  will be zero.

476

## 477 *Discussion*

478 The mate choice model defined in (1) is valid for phenotypes and genotypes, and it only  
 479 requires the abstract representation of any kind of relative mutual mating propensity. At  
 480 the same time, (1) is analogous to the Wright's selection equation for the change in gene  
 481 frequencies so, from the viewpoint of that analogy, the relative propensity would play  
 482 the role of fitness referred to each mating couple. By defining the relationship between  
 483 observed and expected mating frequencies as a function of relative mating propensity,

484 the choice is expressed as a potentiality which is also a key characteristic of fitness  
485 (Wagner, 2010).

486 As with the fitness concept, the mate propensity faces two main aspects, namely the  
487 measurement of differences between couples, and the intrinsic causes that provokes the  
488 propensity values. By expressing the equation of change in terms of the choice  
489 information and its components, this work focused in the first aspect.

490 I have connected the cause of mating choice, which is modeled by the abstract concept  
491 of mutual mating propensity, with the different possible outcomes. Notably, the  
492 connection between mate choice and its consequences appears in terms of information.  
493 The general equation represents the information gained by mate choice with respect to  
494 random mating. This general information is the sum of the information due to sexual  
495 isolation and sexual selection, plus a mixed effect term that can be computed separately  
496 from the others. The mixed term measures the adjustment of the partition components  
497 with respect to the total mate choice information. In addition, the information from  
498 sexual selection is the sum of the male and female intrasexual selection information.

499 Although the model has been constructed assuming discrete phenotypes, it is possible to  
500 estimate the Kullback-Leibler divergence for the continuous case (Pérez-Cruz, 2008)  
501 in order to apply a similar mate choice information partition for quantitative traits.

502 The information framework also provides a baseline for defining adequate null  
503 hypotheses for the distinct aspects of the mate choice problem. In fact, the information  
504 terms are mean log-likelihood ratios, so we can apply them for contrasting the different  
505 null hypothesis about random mating, sexual selection, and isolation.

506 We can perform the test against random mating by considering a chi-square distribution  
507 with  $KK'-1$  degrees of freedom (Evren and Tuna, 2012; Sokal and Rohlf, 1981), where

508  $K \times K'$  is the number of different mating categories. The intrasexual selection  
509 components correspond to  $K-1$  and  $K'-1$  degrees of freedom for  $K$  female and  $K'$  male  
510 traits respectively. In addition, the sexual isolation component corresponds to  $(K-1)(K'-$   
511  $1)$  degrees of freedom. Of course, we may also use randomization tests if we prefer to  
512 rely on the empirical distribution approach.

513 Therefore, if we want to contrast mate choice for a given trait  $Z$ , we test deviations from  
514 zero information in  $JZ_{PTI}$  and its components. However, if we want to contrast mate  
515 choice in general, we must test deviations from zero information in  $J_{PTI}$  which should be  
516 the same that testing a flat preference function across all trait values (Edward, 2015).

517 In addition to contrasting the null hypothesis of random mating, we may take advantage  
518 of the informational partition of mate choice effects to develop different kind of general  
519 models defined by their effects. This is possible because the developed relationships  
520 expose and clarify useful general properties, such as the requirement of non-  
521 multiplicative mutual propensity functions for obtaining sexual isolation effects and the  
522 connection of the marginal propensities at each sex with sexual selection.

523 As an example of the possible insight that can be gained relying in the informational  
524 framework, I reanalyzed the well-known example of *D. melanogaster* mating data from  
525 (Hollocher et al., 1997) and besides confirming previous results on the components of  
526 sexual isolation and selection effects, I have been able to fit a simple two-parameter  
527 model that explains the data by means of a component of sexual isolation plus a sexual  
528 selection component favoring the mating of the M-type females.

529 In addition to the similarity models in which the same phenotype is involved in both  
530 sexes, the preference-display models are also easily interpreted in terms of information

531 and we have been able of inspecting models of full isolation, full intrasexual selection,  
532 and mixed effect models.

533 To conclude, it is worth mentioning that the concept of mate choice is important in the  
534 evolutionary theory and other disciplines. It has been approached from a diversity of  
535 fields and inference methodologies, which has provoked that the terminology has not  
536 always been very precise. This may have contributed to some confusion in terms of  
537 causes and effects jointly with plenty discussion (Ah-King and Gowaty, 2016; Edward,  
538 2015; Janicke et al., 2016; Roughgarden et al., 2015).

539 Here, I have shown that the mean change in the mating phenotypes can be expressed as  
540 the information gained due to mate choice. Overall, the obtained results lead to the  
541 suggestion that the information interpretation of mate choice is an interesting avenue  
542 that may help to improve the study of the causes as well as the effects of this important  
543 evolutionary phenomenon.

### **Acknowledgement**

I would like to thank Carlos Canchaya for their valuable comments on the manuscript.

This work was supported by Xunta de Galicia (Grupo de Referencia Competitiva, ED431C2016-037), Ministerio de Economía y Competitividad (BFU2013-44635-P and CGL2016-75482-P) and by Fondos FEDER (“Unha maneira de facer Europa”).

544

### **545 Appendix A. Relative propensity and phenotypes**

546 We can express the change in the mating phenotypes directly as a function of the mutual  
547 mating propensity  $m$  (or its logarithm, equation 2 in the main text) or as a function of  
548 the mating phenotypes for some trait (equation 3).

549 If we cannot measure directly the values of  $m$  then we simply compute  $J$  based on trait  $Z$   
550 and therefore we are really computing

$$551 \quad JZ_{PTI} = \alpha_z J_{PTI} \text{ so}$$

$$552 \quad \Delta_m Z = JZ_{PTI}$$

553 The distinction between  $JZ_{PTI}$  and  $J_{PTI}$  matters because when the information produced  
554 by mate choice is computed as  $JZ_{PTI}$ , a value of zero could mean that *i*)  $\alpha_z = 0$  i.e. the  
555 trait  $Z$  do not covariate with the differential propensities so that the mating is random  
556 with regard to  $Z$  or, alternatively *ii*)  $J_{PTI} = 0$  meaning that there is no differential mating  
557 propensity at all, i.e. the mating is random independently of the trait we focused on. In  
558 any other case, when  $JZ_{PTI} \neq 0$  it means that the non-random mating is correlated with  
559 the trait  $Z$  i.e.  $cov(m, Z) \neq 0$ .

560 If we have an estimate or a computable proxy for the propensity function  $m$  as for  
561 example, a measure of distance between female and male traits  $|D|$ , or a model with  
562 Gaussian functions (Carvajal-Rodriguez and Rolán-Alvarez, 2014) then the term  $\alpha_z$  can  
563 be separated from  $J_{PTI}$ . In this case we could obtain  $J_{PTI}$  by means of  $J(q', q)$  using the  
564 estimated mating propensities to classify the frequencies and we still can use the  
565 phenotypes  $Z$  and our proxy for  $m$ , to compute  $\alpha_z$  as the ratio of the corresponding  
566 regressions. In this way, we have kept apart the information  $J$  from the scaling  $\alpha$ . The  
567 product of information and scale gives  $\Delta_m Z$ .

568 Suppose that the estimate of  $J_{PTI}$  is different from zero while the scaling is  $\alpha_z = 0$ , then  
569 mate choice do exist but it is not linked with the phenotype  $Z$ . An interested researcher  
570 could compare different traits looking for the ones having the best scaling for the  
571 information  $J_{PTI}$ , i.e. the one that is more involved in the mate choice. It seems that if we

572 are able of having good proxies for mating propensity, this could pave the way for  
573 testing the impact of different traits on mate choice.  
574 Additionally, we still can compute directly  $\Delta Z = Z' - Z$ , i.e. the difference in phenotype  
575 frequencies between observed and expected by random mating. Therefore, we have two  
576 values,  $\Delta_m Z$  and  $\Delta Z$ , for the change in  $Z$ , the discrepancy between them gives an  
577 estimate of the change in  $Z$  caused by other factors than mating propensity (e.g.  
578 predators) so  $e_z = \Delta Z - \Delta_m Z$ .

579 Thus the total change in mean  $Z$  is

$$580 \quad \Delta Z = \alpha_z J_{PTI} + e_z$$

## Appendix B

581 The relationship between sexual selection measured within sex and the pair sexual  
582 selection measured by  $PSS$  is

$$583 \quad J_{PSS} = J_{S1} + J_{S2}$$

584 To see this, recall that  $J_{PSS}$  is the sum of products  $\Delta(p_{1i}p_{2j}) \times \log((p'_{1i} p'_{2j}) / (p_{1i}p_{2j}))$ .

585 Then note that

$$586 \quad \log((p'_{1i}p'_{2j}) / (p_{1i}p_{2j})) = \log(p'_{1i} / p_{1i}) + \log(p'_{2j} / p_{2j})$$

587 and that

$$588 \quad \sum_{ij} \Delta(p_{1i}p_{2j}) = \sum_{ij} (p'_{1i}p'_{2j} - p_{1i}p_{2j}) = \sum_i p'_{1i} \sum_j p'_{2j} - \sum_i p_{1i} \sum_j p_{2j} = 0$$

589 because each summation is 1. Then, after some algebraic rearrangement we obtain

$$\begin{aligned}
 590 \quad J_{PSS} &= \sum_{ij} \Delta(p_{1i}p_{2j}) \log((p'_{1i}p'_{2j})/(p_{1i}p_{2j})) = \sum_i p'_{1i} \log(p'_{1i}/p_{1i}) - \sum_i p_{1i} \log(p'_{1i}/p_{1i}) + \\
 591 \quad &\sum_j p'_{2j} \log(p'_{2j}/p_{2j}) - \sum_j p_{2j} \log(p'_{2j}/p_{2j}) = J_{S1} + J_{S2}.
 \end{aligned}$$

## Appendix C

592 *Proposition 1*

$$593 \quad \sum_{ij} \Delta(p'_{1i}p'_{2j}) \log(PSS_{ij}) = 0$$

594 then

$$595 \quad E_0 = \sum_{ij} (\Delta(p_{1i}p_{2j}) \log(PSI_{ij}) + \Delta(p'_{1i}p'_{2j}) \log(PSS_{ij})) = \sum_{ij} \Delta(p_{1i}p_{2j}) \log(PSI_{ij}).$$

596 First, recall that

$$597 \quad \sum_{ij} \Delta(p'_{1i}p'_{2j}) \log(PSS_{ij}) = \sum_{ij} (q'_{ij} - p'_{1i}p'_{2j}) \log(PSS_{ij})$$

598 and also that by definition of *PSS*

$$599 \quad \log(PSS_{ij}) = \log((p'_{1i}p'_{2j}) / (p_{1i}p_{2j}))$$

600 that can be expressed as

$$601 \quad \log(PSS_{ij}) = \log(p'_{1i} / p_{1i}) + \log(p'_{2j} / p_{2j})$$

602 then by simple substitution and rearranging the terms

$$603 \quad \sum_{ij} \Delta(p'_{1i}p'_{2j}) \log(PSS_{ij}) =$$

$$604 \quad \sum_{ij} (q'_{ij} - p'_{1i}p'_{2j}) \log(PSS_{ij}) = \sum_{ij} q'_{ij} \log(p'_{1i}/p_{1i}) + \sum_{ij} q'_{ij} \log(p'_{2j}/p_{2j}) -$$

$$605 \quad \sum_{ij} (p'_{1i}p'_{2j}) \log(p'_{1i}/p_{1i}) - \sum_{ij} (p'_{1i}p'_{2j}) \log(p'_{2j}/p_{2j})$$

606 Now recall that the  $i$  subscript refers to females and subscript  $j$  to males, then the double  
 607 summatory is the sum through females and males, thus by reminding that  $\sum_i p'_{2j} = \sum_i p'_{1i}$   
 608  $= 1$  we note that

$$609 \quad \sum_{ij} (p'_{1i} p'_{2j}) \log(p'_{1i}/p_{1i}) = \sum_i (p'_{1i}) \log(p'_{1i}/p_{1i}) \sum_j p'_{2j} = \sum_i p'_{1i} \log(p'_{1i}/p_{1i})$$

610 and similarly

$$611 \quad \sum_{ij} (p'_{1i} p'_{2j}) \log(p'_{2j}/p_{2j}) = \sum_j p'_{2j} \log(p'_{2j}/p_{2j})$$

612 so we have

$$613 \quad \sum_{ij} \Delta(p'_{1i} p'_{2j}) \log(PSS_{ij}) =$$

$$614 \quad \sum_{ij} q'_{ij} \log(p'_{1i}/p_{1i}) + \sum_{ij} q'_{ij} \log(p'_{2j}/p_{2j}) - \sum_i p'_{1i} \log(p'_{1i}/p_{1i}) - \sum_j p'_{2j} \log(p'_{2j}/p_{2j})$$

615 Now note that

$$616 \quad \sum_{ij} q'_{ij} \log(p'_{1i}/p_{1i}) = \sum_i \log(p'_{1i}/p_{1i}) \sum_j q'_{ij}$$

617 and that for each female  $i$  the sum through males of the observed mating frequencies  
 618 involving female  $i$  is, by definition,  $p'_{1i}$  i.e.  $\sum_j q'_{ij} = p'_{1i}$  and similarly for each male  $j$  we  
 619 have  $\sum_i q'_{ij} = p'_{2j}$ . Then

$$620 \quad \sum_{ij} q'_{ij} \log(p'_{1i}/p_{1i}) = \sum_i \log(p'_{1i}/p_{1i}) p'_{1i}$$

621 and

$$622 \quad \sum_{ij} q'_{ij} \log(p'_{2j}/p_{2j}) = \sum_j \log(p'_{2j}/p_{2j}) p'_{2j}$$

623 therefore

$$624 \quad \sum_{ij} \Delta(p'_{1i} p'_{2j}) \log(PSS_{ij}) =$$

$$625 \quad \sum_i \log(p'_{1i}/p_{1i}) p'_{1i} - \sum_i p'_{1i} \log(p'_{1i}/p_{1i}) + \sum_j \log(p'_{2j}/p_{2j}) p'_{2j} - \sum_j p'_{2j} \log(p'_{2j}/p_{2j}) = 0$$



626 and so the proposition is true

$$627 \quad E_0 = \sum_{ij} (\Delta(p_{1i}p_{2j})) \log(PSI_{ij})$$

628

629 *Proposition 2*

$$630 \quad E_0 = D'_{KL}(w, q' \| p')$$

631 where

$$632 \quad p' = p'_{1i} p'_{2j}$$

$$633 \quad w_{ij} = (PSS_{ij} - 1) / PTI_{ij}$$

$$634 \quad D'_{KL}(w, q' \| p') = \sum_{ij} w_{ij} q'_{ij} \log(q'_{ij} / (p'_{1i} p'_{2j}))$$

635 From the model (1) and the partitions (4) and (5) in the main text we know that

$$636 \quad (p_{1i}p_{2j}) = (p'_{1i}p'_{2j}) / PSS_{ij}$$

$$637 \quad (p'_{1i}p'_{2j}) = q'_{ij} / PSI_{ij}$$

638 therefore

$$639 \quad \Delta(p_{1i}p_{2j}) = (p'_{1i}p'_{2j}) - (p_{1i}p_{2j}) = (q'_{ij} / PSI_{ij}) - (q'_{ij} / PTI_{ij}) = q'_{ij} [(1 / PSI_{ij}) - (1 / PTI_{ij})]$$

640 and since  $PTI_{ij} = PSI_{ij} \times PSS_{ij}$  we obtain

$$641 \quad \Delta(p_{1i}p_{2j}) = q'_{ij} (PSS_{ij} - 1) / PTI_{ij}$$

642 and so

$$643 \quad E_0 = \sum_{ij} (\Delta(p_{1i}p_{2j})) \log(PSI_{ij}) = \sum_{ij} w_{ij} q'_{ij} \log(PSI_{ij}) = D'_{KL}(w, q' \| p')$$

644 which is Kullback–Leibler-like divergence with weights  $w_{ij}$  in the observations  $q'$ .

## References

- 646 Ah-King, M., Gowaty, P. A., 2016. A conceptual review of mate choice: stochastic demography,  
647 within-sex phenotypic plasticity, and individual flexibility. *Ecology and Evolution*. 6,  
648 4607-4642.
- 649 Akaike, H., Information theory and an extension of the maximum likelihood principle. In: B. N.  
650 Petrov, F. Csaki, Eds.), *Second International Symposium on Information Theory*,  
651 Budapest: Akademiai Kiado, 1973, pp. 267-281.
- 652 Bergstrom, C. T., Real, L. A., 2000. Toward a theory of mutual mate choice: Lessons from two-  
653 sided matching. *Evolutionary Ecology Research*. 493-508.
- 654 Carvajal-Rodriguez, A., *InfoMating*. 2017, pp. Model selection and multimodel inference from  
655 mating frequency data to study sexual selection and sexual isolation effects.
- 656 Carvajal-Rodriguez, A., Rolan-Alvarez, E., 2006. JMATING: a software for the analysis of sexual  
657 selection and sexual isolation effects from mating frequency data. *BMC Evol Biol*. 6, 40.
- 658 Carvajal-Rodriguez, A., Rolán-Alvarez, E., 2014. A comparative study of Gaussian mating  
659 preference functions: a key element of sympatric speciation models. *Biological Journal*  
660 *of the Linnean Society*. 113, 642-657.
- 661 Dall, S. R. X., et al., 2005. Information and its use by animals in evolutionary ecology. *Trends in*  
662 *Ecology & Evolution*. 20, 187-193.
- 663 Darwin, C., 1871. *The descent of man, and selection in relation to sex*. Murray.
- 664 Edward, D. A., 2015. The description of mate choice. *Behavioral Ecology*. 26, 301-310.
- 665 Evren, A., Tuna, E., 2012. On some properties of goodness of fit measures based on statistical  
666 entropy. *International Journal of Research and Reviews in Applied Sciences*. 13, 192-  
667 205.
- 668 Frank, S. A., 2009. Natural selection maximizes Fisher information. *J Evol Biol*. 22, 231-44.
- 669 Frank, S. A., 2012a. Natural selection. IV. The Price equation. *J Evol Biol*. 25, 1002-19.
- 670 Frank, S. A., 2012b. Natural selection. V. How to read the fundamental equations of  
671 evolutionary change in terms of information theory. *J Evol Biol*. 25, 2377-96.
- 672 Frank, S. A., 2013. Natural selection. VI. Partitioning the information in fitness and characters  
673 by path analysis. *Journal of Evolutionary Biology*. 26, 457-471.
- 674 Gavrillets, S., 2004. *Fitness landscapes and the origin of species*. Princeton University Press,  
675 Princeton, N.J.
- 676 Hollocher, H., et al., 1997. Incipient Speciation by Sexual Isolation in *Drosophila melanogaster*:  
677 Variation in Mating Preference and Correlation Between Sexes. *Evolution*. 51, 1175-  
678 1181.
- 679 Hughes, A. L., 2015. Sexual Selection and Mate Choice: Insights from Neutralist Perspectives.  
680 *Evolutionary Biology*. 42, 366-378.
- 681 Janicke, T., et al., 2016. Darwinian sex roles confirmed across the animal kingdom. *Science*  
682 *Advances*. 2.
- 683 Kirkpatrick, M., 1982. Sexual selection and the evolution of female choice. *Evolution*. 1-12.
- 684 Kuijper, B., et al., 2012. A guide to sexual selection theory. *Annual Review of Ecology,*  
685 *Evolution, and Systematics*. 43, 287-311.
- 686 Lande, R., 1981. Models of speciation by sexual selection on polygenic traits. *Proceedings*  
687 *National Academy of Sciences, USA*. 78, 3721-3725.

- 688 Pérez-Cruz, F., Kullback-Leibler divergence estimation of continuous distributions. 2008 IEEE  
689 international symposium on information theory. IEEE, 2008, pp. 1666-1670.
- 690 Pomiankowski, A., Iwasa, Y., 1998. Runaway ornament diversity caused by Fisherian sexual  
691 selection. Proceedings of the National Academy of Sciences of the United States of  
692 America. 95, 5106-5111.
- 693 Price, G. R., 1972. Extension of covariance selection mathematics. Annals of human genetics.  
694 35, 485-490.
- 695 Prum, R. O., 2010. The Lande-Kirkpatrick mechanism is the null model of evolution by  
696 intersexual selection: implications for meaning, honesty, and design in intersexual  
697 signals. Evolution. 64, 3085-3100.
- 698 Roff, D. A., Fairbairn, D. J., 2014. The evolution of phenotypes and genetic parameters under  
699 preferential mating. Ecology and Evolution. 4, 2759-2776.
- 700 Rolán-Alvarez, E., Caballero, A., 2000. Estimating sexual selection and sexual isolation effects  
701 from mating frequencies. Evolution. 54, 30-6.
- 702 Roughgarden, J., et al., 2015. Sexual selection studies: a NESCent catalyst meeting. PeerJ  
703 PrePrints 3:e680v3.
- 704 Schwarz, G., 1978. Estimating the dimension of a model. The Annals of Statistics. 6, 461-464.
- 705 Sokal, R. R., Rohlf, F. J., 1981. Biometry. W. H. Freeman and Co., New York.
- 706 Wagner, G. P., 2010. The measurement theory of fitness. Evolution. 64, 1358-1376.
- 707
- 708
